1           **Effects of low versus high inspired oxygen fraction on**  
2           **myocardial injury after transcatheter aortic valve**  
3           **implantation: A randomized clinical trial**

4  
5   Youn Joung Cho<sup>1</sup>, Cheun Hyeon<sup>1</sup>, Karam Nam<sup>1</sup>, Seohee Lee<sup>1</sup>, Jae-Woo Ju<sup>1</sup>, Jeehoon Kang<sup>2</sup>, Jung-  
6   Kyu Han<sup>2</sup>, Hyo-Soo Kim<sup>2</sup>, Yunseok Jeon<sup>1\*</sup>

7  
8   <sup>1</sup> Department of Anesthesiology and Pain Medicine, Seoul National University Hospital, Seoul  
9   National University College of Medicine, Seoul, South Korea

10   <sup>2</sup> Department of Internal Medicine, Seoul National University Hospital, Seoul National University  
11   College of Medicine, Seoul, South Korea

12  
13   \* Corresponding author

14   E-mail: jeonyunseok@gmail.com

15  
16   **Short title:** oxygen fraction and myocardial injury in transcatheter aortic valve implantation  
17  
18

## 19 **Abstract**

20

## 21 **Background**

22 Oxygen therapy is used in various clinical situation, but its clinical outcomes are inconsistent.

23 The relationship between the fraction of inspired oxygen ( $F_{I}O_2$ ) during transcatheter aortic  
24 valve implantation (TAVI) and clinical outcomes has not been well studied. We investigated  
25 the association of  $F_{I}O_2$  (low vs. high) and myocardial injury in patients undergoing TAVI.

## 26 **Methods**

27 Adults undergoing transfemoral TAVI under general anesthesia were randomly assigned to  
28 receive  $F_{I}O_2$  0.3 or 0.8 during procedure. The primary outcome was the area under the curve  
29 (AUC) for high-sensitivity cardiac troponin I (hs-cTnI) during the first 72 h following TAVI.  
30 Secondary outcomes included the AUC for postprocedural creatine kinase-myocardial band  
31 (CK-MB), acute kidney injury and recovery, conduction abnormalities, pacemaker  
32 implantation, stroke, myocardial infarction, and in-hospital mortality.

## 33 **Results**

34 Between October 2017 and April 2022, 72 patients were randomized and 62 were included in  
35 the final analysis (n=31 per group). The median (IQR) AUC for hs-cTnI in the first 72 h was  
36 42.66 (24.82–65.44) and 71.96 (35.38–116.34) h·ng/mL in the  $F_{I}O_2$  0.3 and 0.8 groups,  
37 respectively (p=0.066). The AUC for CK-MB in the first 72 h was 257.6 (155.6–322.0) and  
38 342.2 (195.4–485.2) h·ng/mL in the  $F_{I}O_2$  0.3 and 0.8 groups, respectively (p=0.132). Acute  
39 kidney recovery, defined as an increase in the estimated glomerular filtration rate  $\geq$  25% of  
40 baseline in 48 h, was more common in the  $F_{I}O_2$  0.3 group (65% vs. 39%, p=0.042). Other  
41 clinical outcomes were comparable between the groups.

## 42 **Conclusions**

43 The F<sub>1</sub>O<sub>2</sub> level did not have a significant effect on periprocedural myocardial injury following  
44 TAVI. However, considering the marginal results, a benefit of low F<sub>1</sub>O<sub>2</sub> during TAVI could  
45 not be ruled out.

46

47 **Keywords:** transcatheter aortic valve implantation; intraoperative oxygen; fraction of  
48 inspired oxygen; oxygen therapy; myocardial injury

49

50

## 51 Introduction

52

53 Although a fraction of inspired oxygen ( $F_{I}O_2$ ) higher than that of ambient air is generally  
54 used during general anesthesia, there is continuing debate about the optimal  $F_{I}O_2$ . High  
55 oxygen tension is beneficial for reducing surgical site infection and in 2016 World Health  
56 Organization recommended that adults receive  $F_{I}O_2$  0.8 during mechanical ventilation under  
57 general anesthesia [1]. However, a more recent systematic review found no difference in the  
58 surgical site infection rate according to the intraoperative  $F_{I}O_2$  amount, and suggested a  
59 negative effect of high  $F_{I}O_2$  on long-term outcomes [2]. Other investigators did not find any  
60 difference in the degree of myocardial injury between perioperative  $F_{I}O_2$  0.3 and 0.8, and  
61 suggested that  $F_{I}O_2$  0.8 is safe for major non-cardiac surgery [3].

62 High oxygen tension may cause oxidative stress, coronary vasoconstriction, and  
63 altered microvascular perfusion, resulting in adverse systemic effects including myocardial  
64 injury [4]. In a meta-analysis of acute myocardial infarction (MI), there was no evidence to  
65 support the routine use of oxygen treatment and the authors could not rule out a harmful  
66 effect of unnecessary oxygen therapy [5]. Constant and brief intermittent hyperoxia both  
67 induced inflammatory responses and cytotoxicity in cardiomyocytes from adult humans [6].  
68 Myocardial injury is common following transcatheter aortic valve implantation (TAVI) [7].  
69 Moreover, abnormally increased cardiac biomarkers were associated with poor outcomes  
70 including periprocedural kidney injury and 30-day and 1-year mortality following TAVI [8].

71 The relationship between the  $F_{I}O_2$  level and myocardial injury has not been well  
72 studied in patients undergoing TAVI. Therefore, this study investigated whether high (0.8)  
73 and low (0.3)  $F_{I}O_2$  during transfemoral TAVI under general anesthesia have different effects  
74 on post-procedural myocardial injury, as indexed by serum cardiac troponin in the early post-  
75 TAVI period.

## 76 **Methods**

77

### 78 **Ethics approval**

79 This randomized controlled trial was approved by the Institutional Review Board of Seoul  
80 National University Hospital (#1707-109-871, on September 11, 2017) and registered at  
81 [clinicaltrials.gov](https://clinicaltrials.gov) (NCT03291210, on September 25, 2017) before patient enrollment. The  
82 study was conducted according to the Good Clinical Practice guidelines and Declaration of  
83 Helsinki. Written informed consent was obtained from all participants, who could withdraw  
84 at any time.

85

### 86 **Study population and randomization**

87 Adults (aged 20–99 years) with aortic stenosis (AS), undergoing elective TAVI under general  
88 anesthesia via the transfemoral approach in a single tertiary academic center (Seoul National  
89 University Hospital, South Korea), were eligible for the study. Eligibility for TAVI was  
90 based on the consensus of a local multidisciplinary heart team, including clinical  
91 cardiologists, cardiac interventionists, cardiac surgeons, radiologists, and anesthesiologists.  
92 The predicted operative mortality risk was calculated using the Society of Thoracic Surgeons  
93 Predicted Risk of Mortality (STS-PROM) score, European System for Cardiac Operative  
94 Risk Evaluation (EuroSCORE) II, and logistic EuroSCORE. The heart team determined the  
95 anesthetic method (general anesthesia or conscious sedation) based on the patients’  
96 comorbidities, preference, and ability to maintain a supine position without profound dyspnea  
97 or restlessness during the procedure. The exclusion criteria were a non-transfemoral  
98 approach, pre-procedural arterial partial pressure of oxygen (PaO<sub>2</sub>) <65 mmHg or receiving  
99 oxygen treatment, severe pre-procedural renal dysfunction (defined as an estimated

100 glomerular filtration rate [eGFR] <30 mL/min/1.73 m<sup>2</sup>), chronic pulmonary obstructive  
101 disease or symptomatic asthma, tuberculosis-destroyed lung, history of lung cancer, acute  
102 coronary syndrome within the past 6 months, documented pre-procedural cardiac troponin I  
103 (cTnI) or creatine kinase-myocardial band (CK-MB) elevation, stroke or transient ischemic  
104 attack within 6 months, pregnancy, and refusal to participate.

105           After enrollment and the informed consent process, the patients were randomized to  
106 receive F<sub>I</sub>O<sub>2</sub> 0.3 or 0.8 during TAVI (1:1 allocation ratio) (Fig 1). Block randomization  
107 (blocks of four or six) was conducted using a computer-generated program by an independent  
108 research nurse on the morning of the intervention. The group assignments were concealed in  
109 an opaque envelop, and all investigators, patients, interventionists, and data analyzers were  
110 blinded to the group allocations.

111

112 **Fig 1. CONSORT diagram.** CK-MB, creatine kinase-myocardial band; COPD, chronic  
113 obstructive pulmonary disease; F<sub>I</sub>O<sub>2</sub>, fraction of inspired oxygen; PaO<sub>2</sub>, arterial partial  
114 pressure of oxygen.

115

## 116 **Study protocol**

117 The routine monitoring techniques of our institution for patients under general anesthesia  
118 were applied, except F<sub>I</sub>O<sub>2</sub> management. Without premedication, 12-lead electrocardiogram,  
119 pulse oxygen saturation (SpO<sub>2</sub>), invasive and noninvasive arterial blood pressure, cerebral  
120 oxygen saturation (ScrbO<sub>2</sub>), and bispectral index monitoring were performed. Left and right  
121 ScrbO<sub>2</sub> were measured using near-infrared spectroscopy (Somanetics INVOS oximeter;  
122 Covidien, Mansfield, MA, USA). Transesophageal or transthoracic echocardiography was  
123 performed to evaluate the valve position and presence of paravalvular regurgitation, as  
124 required by the interventionists.

125 Before inducing anesthesia, all participants were preoxygenated using an anesthesia  
126 machine (Primus; Drägerwerk, Lubeck, Germany) with  $F_{I}O_2$  0.3 or 0.8 according to the  
127 group allocation. After stabilization, general anesthesia was induced by a target-controlled  
128 infusion of propofol (effect-site concentration  $[Ce]$ , 2.5–4.0  $\mu\text{g}/\text{mL}$ ) and remifentanyl (Ce,  
129 1.0–4.0  $\text{ng}/\text{mL}$ ) using a commercial infusion pump (Orchestra, Fresenius Vial, Brézins,  
130 France). Neuromuscular blockade was established by administering rocuronium (0.6  $\text{mg}/\text{kg}$ ).  
131 Then the trachea was intubated and the lungs were ventilated in volume-controlled mode with  
132 a tidal volume of 0.6–0.8  $\text{mL}/\text{kg}$  and ventilatory rate of 9–12 /min. The alveolar recruitment  
133 maneuver was performed at 25  $\text{cmH}_2\text{O}$  for 10 s after tracheal intubation, and a positive end-  
134 expiratory pressure of 5  $\text{cmH}_2\text{O}$  was applied in all patients. According to the group  
135 assignment,  $F_{I}O_2$  was maintained at 0.3 or 0.8 until the end of the TAVI procedure, unless the  
136  $\text{SpO}_2$  was  $<93\%$ . If desaturation occurred,  $F_{I}O_2$  was increased by 0.05–0.1, and an additional  
137 alveolar recruitment maneuver was performed as needed to maintain  $\text{SpO}_2 \geq 93\%$  by the  
138 attending anesthesiologists. On completing the procedure, 100%  $O_2$  was provided to all  
139 patients during anesthesia emergence. Patients were extubated in the intervention room,  
140 monitored in the cardiovascular care unit for 1–2 days, and then transferred to a general ward.  
141 Patients were discharged 5–7 days post-TAVI if they had no procedure-related complications.

142 The TAVI was conducted in accordance with the standard procedures in our  
143 institution. Using a transfemoral approach, a balloon-expandable Sapien III valve (Edwards  
144 Lifesciences, Irvine, CA, USA), self-expandable Evolut Pro or R valve (Medtronic,  
145 Minneapolis, MN, USA), or Lotus valve (Boston Scientific, Natick, MA, USA) was  
146 implanted at the diseased aortic valve. The valve was chosen by the heart team based on the  
147 size and structure of the native valve and sinus, heights of the coronary artery openings, and  
148 considerations regarding future coronary access, the risk of conduction disturbances, and  
149 annular calcification. The iliofemoral arteries were accessed under fluoroscopic guidance and

150 closed percutaneously using Perclose ProGlide vascular suture-mediated closure devices  
151 (Abbott Vascular Devices, Redwood City, CA, USA). Before the procedure, the patients  
152 were given loading doses of dual antiplatelet agents: acetylsalicylic acid and clopidogrel  
153 (both 300 mg). During the procedure, the patients were heparinized with unfractionated  
154 heparin to achieve an activated clotting time >250 s. At completion of the valve implantation,  
155 the effects of heparin were reversed by protamine infusion.

156 During the procedure, arterial blood gas analysis (ABGA) was performed at four  
157 time points: baseline (before anesthesia induction, T1), after inducing general anesthesia  
158 (T2), after valve implantation (T3), and at the end of the procedure (T4). ABGA was  
159 performed using a GEM® Premier 3000 device (Model 5700; Instrumentation Laboratory,  
160 Lexington, MA, USA).

161 Two serum cardiac biomarkers of myocardial injury, high-sensitivity cTnI (hs-cTnI)  
162 and CK-MB, were measured at baseline (before the procedure) and 1, 4, 8, 24, 48, and 72 h  
163 after TAVI. hs-cTnI was measured using an Abbott Architect Plus Analyzer (i2000SR; Flex,  
164 San Jose, CA, USA), which has a limit of detection of 0.0011 µg/L and limit of blank of  
165 0.0007–0.0013 µg/L. An hs-cTnI concentration  $\geq 99^{\text{th}}$  percentile in the normal population  
166 (0.028 µg/L) was deemed abnormal. Serum creatinine concentrations were calibrated using  
167 isotope dilution mass spectrometry (IDMS). The eGFR was calculated using the modified  
168 diet in renal disease (MDRD) equation [9].

169

170 IDMS MDRD eGFR =  $175 \times (\text{serum creatinine})^{-1.154} \times \text{age}^{-0.203} \times (0.742 \text{ for women})$

171

172 Postprocedural acute kidney injury (AKI) was determined based on the serum  
173 creatinine level and urine output according to the Kidney Disease: Improving Global  
174 Outcomes Clinical Practice Guidelines criteria for AKI [10]. AKI was defined as an increase



175 in serum creatinine  $\geq 1.5$  times the baseline level or by  $\geq 0.3$  mg/dL ( $\geq 26.5$   $\mu\text{mol/L}$ )  
176 [AKI<sub>creatinine</sub>], or a urine output  $< 0.5$  mL/kg/h for  $\geq 6$  h within 7 days [AKI<sub>urine output</sub>]. AKI  
177 occurring  $> 7$  days after the procedure was excluded because it might have been unrelated to  
178 the procedure. Acute kidney recovery (AKR) was defined as an increase in eGFR of  $\geq 25\%$   
179 relative to baseline at 48 h post-TAVI [11].

180 The postprocedural development of new conduction abnormalities and incidence of  
181 permanent pacemaker insertion was assessed. Stroke was defined as an acute episode of a  
182 focal or global neurological deficit as a result of hemorrhage or infarction, based on the Valve  
183 Academic Research Consortium-2 (VARC-2) definition [12]. Periprocedural MI was defined  
184 based on a combination of new ischemic symptoms or signs and elevated cardiac biomarkers  
185 within 72 h following TAVI, according to the VARC-2 definition [12].

186

## 187 **Study endpoints and sample size calculation**

188 The primary study outcome was periprocedural myocardial injury, as reflected by the  
189 geometric area under the curve (AUC) for periprocedural serum hs-cTnI in the first 72 h post-  
190 TAVI, calculated according to the trapezoidal rule. Secondary outcomes were the AUC for  
191 serum CK-MB in the first 72 h post-TAVI, and the peak serum hs-cTnI and CK-MB levels in  
192 the same period. Post-procedural clinical outcomes were also evaluated, including AKI,  
193 AKR, new conduction abnormalities, permanent pacemaker insertion, stroke, MI, and in-  
194 hospital cardiovascular mortality.

195 To calculate the sample size, we conducted a pilot study of 10 patients undergoing  
196 transfemoral TAVI under general anesthesia. The AUC for serum hs-cTnI in the first 72 h  
197 after TAVI was  $40.24 \pm 28.16$  ng/mL. Assuming that a 50% difference in hs-cTnI levels  
198 between the two treatment groups in the first 72 h is clinically relevant, 32 patients were  
199 required for each group at 80% power and an alpha error of 5%. Considering a 10% dropout

200 rate, we recruited 36 patients to each group (a total of 72 patients).

201

## 202 **Statistical analysis**

203 Data are presented as the mean  $\pm$  SD, median (interquartile range, IQR), or number (%) after  
204 normality was tested using the Kolmogorov–Smirnov test. The primary endpoint, i.e., the  
205 AUC for serum hs-cTnI in the first 72 h after TAVI, was analyzed using the Mann–Whitney  
206 *U* test according to the data distribution. Other continuous variables were analyzed using the  
207 independent *t*-test or Mann–Whitney *U* test after performing a normality test. Categorical  
208 variables were analyzed using Pearson’s chi square test or Fisher’s exact test. For repeated  
209 measures, a linear mixed model with Bonferroni correction was used to compare the groups.  
210 In the mixed model, group, measurement time, and their interaction were fixed effects, while  
211 subject was a random effect. Plots of residuals versus fitted values were checked in terms of  
212 whether the error terms (residuals) had a mean of zero and constant variance. The normality  
213 assumption for repeated measures was assessed using histograms and quantile–quantile plots  
214 (for residuals). Multivariable logistic regression analysis was performed to identify  
215 independent risks for F<sub>1</sub>O<sub>2</sub> and postprocedural hs-cTnI. Odds ratios (ORs) were adjusted for  
216 age, sex, STS-PROM score, C-reactive protein, left ventricular (LV) ejection fraction (EF),  
217 procedural time, and new conduction abnormality, and 95% confidence intervals (CIs) were  
218 presented. The analysis was done in an intention-to-treat manner. All analyses were  
219 performed using IBM SPSS Statistics (ver. 21.0; IBM Corp., Armonk, NY, USA) or R  
220 software (ver. 3.5.1; R Development Core Team, Vienna, Austria). A P value <0.05 was  
221 considered statistically significant.

222

## 223 Results

224  
225 Patients were screened for eligibility between October 18, 2017 and April 6, 2022. Of 189  
226 patients, 117 were excluded based on the exclusion criteria (Fig 1). After 72 patients were  
227 randomized to the F<sub>I</sub>O<sub>2</sub> 0.3 or 0.8 groups (n=36 each), 10 patients were excluded due to pre-  
228 procedural PaO<sub>2</sub> <65 mmHg (n=4), elevated pre-procedural cTnI (n=5), or procedure  
229 cancellation (n=1). We noted violations of the exclusion criteria (pre-procedural PaO<sub>2</sub> <65  
230 mmHg or elevated cardiac biomarkers) in nine patients and excluded them from the analysis.  
231 Thus, a total of 62 patients (31 per group) were included in the final analysis. We performed  
232 additional sub-analysis including five patients (n=2 in the F<sub>I</sub>O<sub>2</sub> 0.3 group and n=3 in the F<sub>I</sub>O<sub>2</sub>  
233 0.8 group) who had elevated cardiac biomarkers after randomization.

234 Tables 1 and 2 present the baseline characteristics of the included patients and  
235 procedural variables. Baseline characteristics were well balanced between the groups. The  
236 median (IQR) age of the included patients was 79 (77–83) years. The median (IQR)  
237 procedural duration was 80 (70–95) min.

238

239 **Table 1. Baseline characteristics in patients undergoing transfemoral transcatheter**  
240 **aortic valve implantation.**

|              | F <sub>I</sub> O <sub>2</sub> 0.3<br>(n=31) | F <sub>I</sub> O <sub>2</sub> 0.8<br>(n=31) | p value |
|--------------|---------------------------------------------|---------------------------------------------|---------|
| Demographics |                                             |                                             |         |
| Age, yr      | 79 (76–82 [range 64–90])                    | 79 (77–84 [range 58–94])                    | 0.783   |
| Male         | 12 (39%)                                    | 12 (39%)                                    | >0.999  |
| Height, cm   | 156 ± 10.0                                  | 157 ± 10                                    | 0.776   |
| Weight, kg   | 59.1 ± 10.7                                 | 60.0 ± 11.0                                 | 0.742   |

|                                       |                     |                     |       |
|---------------------------------------|---------------------|---------------------|-------|
| Body mass index, kg/m <sup>2</sup>    | 24.29 ± 3.72        | 24.42 ± 3.69        | 0.892 |
| Body surface area, m <sup>2</sup>     | 1.58 ± 0.17         | 1.59 ± 0.18         | 0.740 |
| Current smoker                        | 1 (3%)              | 0 (0%)              | 0.313 |
| NYHA functional class                 |                     |                     | 0.496 |
| I                                     | 8 (26%)             | 6 (19%)             |       |
| II                                    | 14 (45%)            | 18 (58%)            |       |
| III/IV                                | 9 (29%)             | 7 (23%)             |       |
| Predicted risk calculation            |                     |                     |       |
| STS PROM, %                           | 2.759 (1.936–3.724) | 3.162 (2.370–4.060) | 0.269 |
| EuroSCORE II, %                       | 2.72 (1.64–3.95)    | 3.54 (1.35–7.01)    | 0.356 |
| Logistic EuroSCORE, %                 | 4.52 (1.56–7.46)    | 4.83 (1.95–7.01)    | 0.564 |
| Echocardiographic and CT data         |                     |                     |       |
| LV EF, %                              | 63 (59–67)          | 66 (61–68)          | 0.441 |
| AV area, cm <sup>2</sup>              | 0.7 (0.6–0.8)       | 0.7 (0.6–0.9)       | 0.309 |
| AV peak velocity, m/s                 | 4.6 ± 0.4           | 4.6 ± 0.6           | 0.736 |
| AV mean pressure gradient,<br>mmHg    | 49 (44–60)          | 50 (43–66)          | 0.933 |
| AV perimeter, mm                      | 73.0 ± 6.4          | 72.0 ± 5.6          | 0.513 |
| LVIDd, mm                             | 46 (42–50)          | 46 (41–49)          | 0.534 |
| LVIDs, mm                             | 28 (25–32)          | 27 (24–31)          | 0.398 |
| Stroke volume, mL                     | 77 ± 22             | 81 ± 17             | 0.538 |
| Height of LMCA os from annulus,<br>mm | 12.7 ± 2.4          | 12.2 ± 2.2          | 0.409 |
| Height of RCA os from annulus,<br>mm  | 14.7 ± 2.3          | 14.2 ± 2.5          | 0.410 |
| Baseline laboratory findings          |                     |                     |       |
| Hematocrit, %                         | 36.0 ± 4.3          | 34.8 ± 4.6          | 0.776 |
| eGFR, ml/min/1.73 m <sup>2</sup>      | 67.5 ± 16.9         | 66.5 ± 16.0         | 0.809 |
| Creatinine, mg/dL                     | 0.88 (0.81–1.05)    | 0.91 (0.76–1.13)    | 0.800 |

|                              |                  |                  |        |
|------------------------------|------------------|------------------|--------|
| Albumin, g/dL                | 4.0 (3.9–4.3)    | 4.0 (3.7–4.3)    | 0.666  |
| hs-cTnI, ng/mL               | 0.00 (0.00–0.00) | 0.00 (0.00–0.00) | 0.757  |
| CK-MB, ng/mL                 | 1.1 (1.1–1.4)    | 1.0 (0.8–1.2)    | 0.065  |
| hs-CRP, mg/dL                | 0.07 (0.04–0.33) | 0.07 (0.04–0.14) | 0.750  |
| Comorbidities                |                  |                  |        |
| Hypertension                 | 26 (84%)         | 22 (71%)         | 0.224  |
| Diabetes                     | 7 (23%)          | 11 (36%)         | 0.263  |
| Dyslipidemia                 | 17 (55%)         | 21 (68%)         | 0.297  |
| Coronary artery disease      | 6 (19%)          | 7 (23%)          | 0.755  |
| Angina/previous MI           | 7 (23%)          | 6 (19%)          | 0.755  |
| Medications                  |                  |                  |        |
| Aspirin                      | 13 (42%)         | 13 (42%)         | >0.999 |
| Anti-platelet agents         | 12 (39%)         | 16 (52%)         | 0.307  |
| Non-vitamin K anticoagulants | 3 (10%)          | 3 (10%)          | >0.999 |
| Beta-blockers                | 19 (61%)         | 16 (52%)         | 0.442  |
| ARB/ACEi                     | 20 (65%)         | 18 (58%)         | 0.602  |
| Calcium channel blockers     | 11 (36%)         | 15 (48%)         | 0.303  |
| Oral hypoglycemic agents     | 8 (26%)          | 9 (29%)          | 0.776  |
| Diuretics                    | 17 (55%)         | 14 (45%)         | 0.446  |
| Nitrates                     | 6 (19%)          | 4 (13%)          | 0.490  |
| Statin                       | 19 (61%)         | 22 (71%)         | 0.421  |

241 Values are median (interquartile range), n (%), or mean  $\pm$  SD.

242 ACEi, angiotensin converting enzyme inhibitor; ARB, angiotensin receptor blocker; AV,  
 243 aortic valve; CK-MB, creatine kinase-myocardial band; COPD, chronic obstructive  
 244 pulmonary disease; CT, computed tomography; EF, ejection fraction; eGFR, estimated  
 245 glomerular filtration rate; EuroSCORE, European System for Cardiac Operative Risk  
 246 Evaluation; F<sub>I</sub>O<sub>2</sub>, fraction of inspired oxygen; hs-CRP, high-sensitivity C-reactive protein;  
 247 hs-cTnI, high-sensitivity cardiac troponin I; LMCA, left main coronary artery; LV, left

248 ventricular; LVIDd, left ventricular internal diameter end diastole; LVIDs, left ventricular  
 249 internal diameter end systole; MI, myocardial infarction; NYHA, New York Heart  
 250 Association; RCA, right coronary artery; STS PROM, Society of Thoracic Surgeons  
 251 Predicted Risk of Mortality; TIA, transient ischemic attack.

252

253 **Table 2. Valve characteristics and procedural variables in patients undergoing**

254 **transfemoral transcatheter aortic valve implantation.**

|                              | F <sub>I</sub> O <sub>2</sub> 0.3<br>(n=31) | F <sub>I</sub> O <sub>2</sub> 0.8<br>(n=31) | p value |
|------------------------------|---------------------------------------------|---------------------------------------------|---------|
| Prosthetic valve type        |                                             |                                             | 0.647   |
| Sapien III                   | 13 (42%)                                    | 14 (45%)                                    |         |
| Evolut Pro or R              | 15 (48%)                                    | 12 (39%)                                    |         |
| Lotus valve                  | 3 (10%)                                     | 5 (16%)                                     |         |
| Prosthetic valve size, mm    |                                             |                                             | 0.698   |
| 23                           | 6 (19%)                                     | 9 (29%)                                     |         |
| 25                           | 1 (3%)                                      | 2 (7%)                                      |         |
| 26                           | 18 (58%)                                    | 14 (45%)                                    |         |
| 29                           | 6 (19%)                                     | 6 (19%)                                     |         |
| Paravalvular regurgitation   |                                             |                                             | 0.112   |
| No                           | 12 (39%)                                    | 13 (42%)                                    |         |
| Trivial                      | 9 (29%)                                     | 15 (48%)                                    |         |
| Mild                         | 9 (29%)                                     | 2 (7%)                                      |         |
| Moderate                     | 1 (3%)                                      | 1 (3%)                                      |         |
| Procedure duration, min      | 80 (70–95)                                  | 80 (70–95)                                  | 0.860   |
| Anesthesia duration, min     | 140 (120–155)                               | 135 (120–160)                               | 0.888   |
| Amount of contrast media, mL | 250 (200–288)                               | 250 (210–326)                               | 0.404   |

|                           |         |         |       |
|---------------------------|---------|---------|-------|
| Transfusion of pRBC, unit | 0 (0–1) | 0 (0–1) | 0.675 |
|---------------------------|---------|---------|-------|

255 Values are n (%) or median (interquartile range).

256  $F_{I}O_2$ , fraction of inspired oxygen; pRBC, packed red blood cell.

257

258 During the procedure,  $PaO_2$ , arterial oxygen saturation ( $SaO_2$ ), and  $SpO_2$  were higher  
259 in the  $F_{I}O_2$  0.8 than  $F_{I}O_2$  0.3 group (Fig 2). Two patients in the  $F_{I}O_2$  0.3 group required  
260 adjustment of  $F_{I}O_2$  to 0.4 during the procedure because transient  $SpO_2 < 93\%$  was observed.  
261 The mean left and right cerebral oximetry values were higher in the  $F_{I}O_2$  0.8 than  $F_{I}O_2$  0.3  
262 group (Fig 2). For serial measurements, interactions between measurement time and group  
263 were significant for  $PaO_2$ ,  $SaO_2$ , and the mean  $ScrbO_2$  ( $p < 0.001$ ,  $< 0.001$ , and 0.032,  
264 respectively), but not for  $SpO_2$  ( $p = 0.330$ ).

265

266 **Fig 2. Changes in arterial oxygenation, pulse oxygen saturation, and cerebral oximetry**  
267 **in patients receiving a fraction of inspired oxygen of 0.3 or 0.8 during transcatheter**  
268 **aortic valve implantation.**  $F_{I}O_2$ , fraction of inspired oxygen;  $PaO_2$ , arterial partial pressure  
269 of oxygen;  $SaO_2$ , arterial oxygen saturation;  $SpO_2$ , pulse oxygen saturation;  $ScrbO_2$ , cerebral  
270 oxygen saturation. \*  $p < 0.001$  compared to the  $F_{I}O_2$  0.3 group. #  $p = 0.003$  between the  
271 groups (mixed model). §  $p < 0.05$  compared to the  $F_{I}O_2$  0.3 group.

272

273 The primary outcome, the AUC for serum hs-cTnI in the first 72 h post-TAVI, was  
274 higher in the  $F_{I}O_2$  0.8 than  $F_{I}O_2$  0.3 group (71.96 [35.38–116.34] vs. 42.66 [24.82–65.44]  
275 h·ng/mL), but the difference was not statistically significant ( $p = 0.066$ ) (Fig 3). The secondary  
276 outcome (AUC for CK-MB in the first 72 h post-TAVI) was also higher in the  $F_{I}O_2$  0.8  
277 group, but not significantly (342.2 [195.4–485.2] vs. 257.6 [155.6–322.0] h·ng/mL;  $p = 0.132$ )  
278 (Fig 3). The peak hs-cTnI and CK-MB levels during the first 72 h post-TAVI were also non-

279 significantly higher in the F<sub>I</sub>O<sub>2</sub> 0.8 group (1.79 [1.09–3.77] vs. 1.30 [1.00–1.58] ng/mL and  
280 10.9 [5.7–15.6] vs. 7.5 [6.0–11.9] ng/mL; p=0.051 and 0.159, respectively). For  
281 periprocedural serial measurements, the group differences in hs-cTnI and CK-MB did not  
282 reach statistical significance (p=0.125 and 0.084, respectively; mixed model). The interaction  
283 between measurement time and group was not significant (p=0.200 and 0.096 for hs-cTnI and  
284 CK-MB, respectively). When including the five patients who completed the study protocol  
285 and were excluded from the final analysis due to elevated baseline hs-cTnI after  
286 randomization, there were no significant differences in the AUCs for hs-cTnI and CK-MB in  
287 the first 72 h post-TAVI between the groups (S1 Fig). After adjustment for various risk  
288 factors, there was no significant association between the F<sub>I</sub>O<sub>2</sub> and AUC for hs-cTnI post-  
289 TAVI (OR: 3.644, 95% CI: 0.864–15.371; p=0.078).

290

291 **Fig 3. Changes in cardiac biomarkers in the first 72 h in patients who received a**  
292 **fraction of inspired oxygen of 0.3 or 0.8 during transcatheter aortic valve implantation.**

293 AUC, area under the curve; CK-MB, creatine kinase-myocardial band; hs-cTnI, high-  
294 sensitivity cardiac troponin I; TAVI, transcatheter aortic valve implantation.

295

296 The postprocedural incidence of AKI did not differ between F<sub>I</sub>O<sub>2</sub> 0.3 and 0.8 groups  
297 (36% vs. 42%; p=0.602) (Table 3). However, AKR was more frequent in the F<sub>I</sub>O<sub>2</sub> 0.3 than  
298 F<sub>I</sub>O<sub>2</sub> 0.8 group (65% vs. 39%; p=0.042). Other postprocedural clinical outcomes, such as  
299 cardiovascular mortality or length of hospitalization, were comparable between the two  
300 groups (Table 3).

301

302 **Table 3. Postprocedural variables in patients received fraction of inspired oxygen 0.3 or**  
303 **0.8 during transfemoral transcatheter aortic valve implantation.**



|                                               | F <sub>I</sub> O <sub>2</sub> 0.3<br>(n=31) | F <sub>I</sub> O <sub>2</sub> 0.8<br>(n=31) | p value        |
|-----------------------------------------------|---------------------------------------------|---------------------------------------------|----------------|
| Echocardiographic data (at discharge)         |                                             |                                             |                |
| LV EF, %                                      | 63 (60–67)                                  | 65 (62–69)                                  | 0.140          |
| AV area, cm <sup>2</sup>                      | 1.8 (1.5–2.1)                               | 1.6 (1.3–1.9)                               | 0.126          |
| AV peak velocity, m/s                         | 2.2 ± 0.4                                   | 2.3 ± 0.5                                   | 0.350          |
| AV mean pressure gradient, mmHg               | 10 (6–13)                                   | 11 (8–14)                                   | 0.386          |
| LVIDd, mm                                     | 45 (42–48)                                  | 45 (43–47)                                  | 0.854          |
| LVIDs, mm                                     | 27 (25–31)                                  | 27 (25–30)                                  | 0.685          |
| Stroke volume, mL                             | 74 ± 24                                     | 71 ± 17                                     | 0.538          |
| Peak creatinine within 7 days, mg/dL          | 0.87 (0.77–0.99)                            | 0.89 (0.74–1.16)                            | 0.508          |
| Peak hs-CRP within 72 h, mg/dL                | 3.71 ± 2.21<br>4.14 (1.56–5.22)             | 4.38 ± 3.23<br>4.25 (2.01–5.84)             | 0.393<br>0.694 |
| AKI within 7 days                             | 11 (36%)                                    | 13 (42%)                                    | 0.602          |
| AKI <sub>creatinine</sub>                     | 0 (0%)                                      | 3 (10%)                                     | 0.238          |
| AKI <sub>urine output</sub>                   | 11 (36%)                                    | 12 (39%)                                    | 0.793          |
| AKR within 48 h                               | 20 (65%)                                    | 12 (39%)                                    | 0.042          |
| Both AKI and AKR                              | 7 (23%)                                     | 3 (10%)                                     | 0.167          |
| New conduction abnormality                    | 15 (48%)                                    | 11 (36%)                                    | 0.303          |
| PPM insertion                                 | 3 (10%)                                     | 4 (13%)                                     | > 0.999        |
| Stroke                                        | 1 (3%)                                      | 1 (3%)                                      | > 0.999        |
| Myocardial infarction                         | 0                                           | 0                                           |                |
| In-hospital mortality                         | 0                                           | 0                                           |                |
| Post-procedural hospital length of stay, days | 6 (5–7)                                     | 5 (5–7)                                     | 0.403          |

304 Values are median (interquartile range), mean ± SD, or n (%). AKI was defined as an  
305 increase in serum creatinine ≥ 1.5 times the baseline level or by ≥ 0.3 mg/dL (≥ 26.5 μmol/L)  
306 for [AKI<sub>creatinine</sub>], or urine output < 0.5 mL/kg/h for ≥ 6 h within 7 days for [AKI<sub>urine output</sub>].  
307 AKI, acute kidney injury; AKR, acute kidney recovery; AV, aortic valve; EF, ejection  
308 fraction; F<sub>I</sub>O<sub>2</sub>, fraction of inspired oxygen; LV, left ventricular; LVIDd, left ventricular

309 internal diameter end diastole; LVIDs, left ventricular internal diameter end systole; PPM,

310 permanent pacemaker.

311

## 312 **Discussion**

313

314 Compared to the F<sub>1</sub>O<sub>2</sub> 0.3 group, the F<sub>1</sub>O<sub>2</sub> 0.8 group showed a greater postprocedural  
315 elevation of cardiac biomarkers, albeit without statistical significance. Postprocedural AKR  
316 was more frequent in the F<sub>1</sub>O<sub>2</sub> 0.3 group. There was no difference in other periprocedural  
317 outcomes between the groups.

318

## 319 **Myocardial injury after TAVI**

320 Even after successful TAVI, the cardiac biomarkers cTnI and CK-MB showed post-  
321 procedure increases despite prompt relief of transvalvular pressure overload, and  
322 periprocedural myocardial injury occurred along with transient deterioration in myocardial  
323 function [13]. Significant deterioration in the myocardial performance index, which implies  
324 both systolic and diastolic dysfunction, was observed immediately following TAVI [13].  
325 New myocardial late enhancement with an ischemic pattern, indicating myocardial damage,  
326 was detected on cardiac magnetic resonance images following both balloon-expandable and  
327 self-expandable valve implantation [14].

328       Transient LV dysfunction and injury following TAVI seems to be partly influenced  
329 by procedural aspects of transcatheter valve deployment [15]. Procedure-related mechanical  
330 trauma during TAVI, including during balloon valvuloplasty, valve positioning, and  
331 prosthesis delivery, also plays a substantial role in myocardial damage [16]. Rapid ventricular  
332 pacing is used to temporarily reduce the LV output during pre-implantation balloon  
333 valvuloplasty and balloon-expandable valve implantation, and for post-implantation  
334 ballooning to reduce paravalvular leakage. Rapid ventricular pacing transiently reduces  
335 microvascular tissue perfusion and the flow index in small- and medium-sized vessels, and

336 induces partial microcirculatory arrest and delayed recovery of microflow [17]. Subsequently,  
337 ventricular stunning and subsequent dysfunction may occur [15].

338

## 339 **Hyperoxia and myocardial injury**

340 The role of oxidative stress in reperfusion injury is relatively well established. Abrupt  
341 oxidative reactions following reperfusion produce reactive oxygen species (ROS) from  
342 cardiomyocytes and endothelial cells, which amplifies local inflammatory responses and  
343 leads to a vicious cycle of ROS production [18]. The biological mechanism underlying the  
344 adverse effects of hyperoxia is related to the generation of ROS, specifically the superoxide  
345 anion, which has a negative impact on coronary blood flow and LV distensibility [19].  
346 Hyperoxia can exacerbate oxidative stress and thereby worsen coronary vasoconstriction and  
347 myocardial injury. Interestingly, hyperoxic reperfusion limited myocardial necrosis in rodents  
348 with cardiovascular risk factors more so than in a normoxemic reperfusion group, while the  
349 reverse occurred in healthy rodents [18]. Similarly, in a preliminary canine MI model,  
350 administering 100% oxygen had beneficial effects on the myocardium by reducing  
351 myocardial infarct size and improving the EF after reperfusion compared to room-air  
352 ventilation [20].

353 However, in the AVOID trial, patients presenting with acute MI were randomized to  
354 receive oxygen 8 L/min via face mask or ambient air, and oxygen treatment increased  
355 myocardial injury and infarct size in patients without hypoxia [21]. In patients admitted to the  
356 intensive care unit (ICU), conservative use of oxygen, which aimed to maintain arterial  
357 oxygen tension within the physiological range, reduced ICU mortality compared to  
358 conventional use of oxygen [22]. In the large randomized DETO2X-AMI study, there was no  
359 difference in 1-year mortality or the peak cardiac troponin level between patients with  
360 suspected MI who received supplemental oxygen versus ambient air [23]. During general

361 anesthesia for major non-cardiac surgery, there was no difference in myocardial injury—  
362 assessed using the AUC for high-sensitive troponin in the first 3 postoperative days—  
363 between F<sub>I</sub>O<sub>2</sub> 0.3 and 0.8 administered intraoperatively and for 2 h after surgery [3]. In the  
364 ICU-ROX study, conservative use of F<sub>I</sub>O<sub>2</sub> ( $\leq 0.21$ ) during mechanical ventilation in adult ICU  
365 patients resulted in no difference in the number of ventilator-free days compared to standard  
366 administration of F<sub>I</sub>O<sub>2</sub> [24]. In a more recent nationwide registry trial, high oxygen  
367 supplementation (6–8 L/min by face mask) resulted in no significant difference in the 30-day  
368 or 1-year mortality rate in patients with suspected acute coronary syndrome compared to low  
369 oxygen treatment [25].

370

## 371 **Myocardial injury and clinical outcomes after TAVI**

372 Cardiac biomarkers elevation following surgery or intervention result from perioperative  
373 hemodynamic stress, inflammation, or oxygen supply and demand imbalance [26].  
374 Periprocedural myocardial injury following TAVI was associated with a significantly  
375 increased risk of poor short- and long-term clinical outcomes, including 30-day and 1-year  
376 mortality, neurological events, and postprocedural permanent pacemaker implantation [27].

377 In our study, high oxygen tension during TAVI tended to increase the release of  
378 cardiac biomarkers in the first 72 h post-TAVI compared to the low oxygen tension group,  
379 but the difference was not significant. There was no clinical impact of the level of  
380 intraoperative oxygen tension during TAVI, except that recovery of kidney function was  
381 more common in the low- compared to the high-F<sub>I</sub>O<sub>2</sub> group.

382

## 383 **Acute kidney recovery**

384 Acute kidney recovery, which is a relatively recently described phenomenon, has been  
385 observed more frequently than AKI after both TAVI and surgical aortic valve replacement

386 (SAVR) [28]. Following TAVI or SAVR, normalization of the aortic valve area, prompt  
387 relief of the trans-aortic pressure gradient, and normalization of post-stenotic flow  
388 abnormality occur. Regarding renal blood flow, a rapid increase in cardiac output and  
389 reduced LV afterload may cause abrupt hemodynamic changes in the early postprocedural  
390 period, such as renal congestion. In a recent prospective registry analysis, both AKI and AKR  
391 early after TAVI were independent predictors of cardiovascular mortality [29]. In our study  
392 cohort, 10 of the 62 (16%) patients met the criteria for both AKI and AKR during the study  
393 period (Table 3). Rapid changes in renal hemodynamics could have occurred in these groups,  
394 and both post-TAVI AKI and AKR may reflect a cardiorenal aspect of the extra-cardiac  
395 damage characterizing severe AS. Further studies are required to assess the relationship  
396 between renal circulatory changes and clinical outcomes in AS patients following TAVI.

397

## 398 **Study limitations**

399 This study has some limitations. First, it was a single-center trial with relatively few patients,  
400 and was only powered for one surrogate cardiac biomarker, hs-cTnI. Although we observed a  
401 trend toward reduced hs-cTnI release and better postprocedural kidney recovery, we cannot  
402 definitely conclude that arterial oxygenation is beneficial for patients undergoing TAVI in  
403 terms of periprocedural myocardial and renal protection. Second, we included patients  
404 undergoing general anesthesia for transfemoral TAVI in this study. However, many patients  
405 undergo TAVI under conscious sedation or even local anesthesia, unless they are at very high  
406 periprocedural risk due to severely compromised cardiopulmonary function or the inability to  
407 maintain a stable supine position, for example. Nevertheless, the included patients had  
408 comparable characteristics regarding potential risk factors for postprocedural myocardial  
409 injury between the two groups. Future investigators could compare the oxygenation strategies  
410 of minimal supplemental oxygen and no supplemental oxygen, as in the treatment of acute

411 MI patients without hypoxia, in terms of the likelihood of avoiding unnecessary  
412 periprocedural oxidative stress and protecting multiple organ systems, in patients undergoing  
413 TAVI under conscious sedation or local anesthesia. Third, we included relatively low-risk  
414 patients; we excluded those who were already hypoxemic or required supplemental oxygen,  
415 and those with acute coronary syndrome or renal failure. In high-risk patients with severe LV  
416 dysfunction or poor oxygenation, however, different supplemental oxygen strategies may  
417 have a differential impact on myocardial injury and other clinical outcomes. Therefore,  
418 further studies are required of high-risk patients, who may be more suitable candidates for  
419 TAVI. Lastly, there is lack of control subjects undergoing SAVR in evaluating oxygenation  
420 and periprocedural myocardial injury in this study. As it is beyond the primary aim of the  
421 present study, future studies can be conducted regarding periprocedural oxygen content and  
422 myocardial injury in patients undergoing TAVI vs. SAVR.

423

## 424 **Conclusions**

425 In conclusion, the  $F_{I}O_2$  level did not have a significant effect on periprocedural myocardial  
426 injury following TAVI with general anesthesia. However, considering the marginal results, a  
427 benefit of low  $F_{I}O_2$  during TAVI could not be ruled out.

428

## 429 **Acknowledgements**

430 The authors gratefully acknowledge Sun-Young Jung, a statistician, who is collaborating with  
431 our institution, for her assistance in the statistical analysis and invaluable advice and  
432 comments.

## 434 **References**

- 435 1. Allegranzi B, Zayed B, Bischoff P, Kubilay NZ, de Jonge S, de Vries F, et al. New  
436 WHO recommendations on intraoperative and postoperative measures for surgical site  
437 infection prevention: an evidence-based global perspective. *Lancet Infect Dis* 2016; 16:  
438 e288–e303. doi: 10.1016/S1473-3099(16)30402-9.
- 439 2. Fasquel C, Huet O, Ozier Y, Quesnel C, Garnier M. Effects of intraoperative high  
440 versus low inspiratory oxygen fraction (FiO<sub>2</sub>) on patient's outcome: A systematic  
441 review of evidence from the last 20 years. *Anaesth Crit Care Pain Med* 2020; 39: 847–  
442 858. doi: 10.1016/j.accpm.2020.07.019.
- 443 3. Holse C, Aasvang EK, Vester-Andersen M, Rasmussen LS, Wetterslev J, Christensen  
444 R, et al. Hyperoxia and Antioxidants for Myocardial Injury in Noncardiac Surgery: A 2  
445 x 2 Factorial, Blinded, Randomized Clinical Trial. *Anesthesiology* 2022; 136: 408-419.  
446 doi: 10.1097/ALN.0000000000004117.
- 447 4. Damiani E, Donati A, Girardis M. Oxygen in the critically ill: friend or foe? *Curr Opin*  
448 *Anaesthesiol* 2018; 31: 129–135. doi: 10.1097/ACO.0000000000000559.
- 449 5. Cabello JB, Burls A, Emparanza JI, Bayliss SE, Quinn T. Oxygen therapy for acute  
450 myocardial infarction. *Cochrane Database Syst Rev* 2016; 12: CD007160. doi:  
451 10.1002/14651858.CD007160.pub4.
- 452 6. Hafner C, Wu J, Tiboldi A, Hess M, Mitulovic G, Kaun C, et al. Hyperoxia Induces



- 453 Inflammation and Cytotoxicity in Human Adult Cardiac Myocytes. *Shock* 2017; 47:  
454 436–444. doi: 10.1097/SHK.0000000000000740.
- 455 7. Carrabba N, Valenti R, Migliorini A, Vergara R, Parodi G, Antonucci D. Prognostic  
456 value of myocardial injury following transcatheter aortic valve implantation. *Am J*  
457 *Cardiol* 2013; 111: 1475–1481. doi: 10.1016/j.amjcard.2013.01.301.
- 458 8. Barbash IM, Dvir D, Ben-Dor I, Badr S, Okubagzi P, Torguson R, et al. Prevalence and  
459 effect of myocardial injury after transcatheter aortic valve replacement. *Am J Cardiol*  
460 2013; 111: 1337–1343. doi: 10.1016/j.amjcard.2012.12.059.
- 461 9. Levey AS, Coresh J, Greene T, Stevens LA, Zhang YL, Hendriksen S, et al. Using  
462 standardized serum creatinine values in the modification of diet in renal disease study  
463 equation for estimating glomerular filtration rate. *Ann Intern Med* 2006; 145: 247–254.  
464 doi: 10.7326/0003-4819-145-4-200608150-00004.
- 465 10. Khwaja A. KDIGO clinical practice guidelines for acute kidney injury. *Nephron Clin*  
466 *Pract* 2012; 120: c179–184. doi: 10.1159/000339789.
- 467 11. Azarbal A, Malenka DJ, Huang YL, Ross CS, Solomon RJ, DeVries JT, et al. Recovery  
468 of Kidney Dysfunction After Transcatheter Aortic Valve Implantation (from the  
469 Northern New England Cardiovascular Disease Study Group). *Am J Cardiol* 2019; 123:  
470 426–433. doi: 10.1016/j.amjcard.2018.10.042.
- 471 12. Kappetein AP, Head SJ, Genereux P, Piazza N, van Mieghem NM, Blackstone EH, et  
472 al. Updated standardized endpoint definitions for transcatheter aortic valve  
473 implantation: the Valve Academic Research Consortium-2 consensus document. *Eur*  
474 *Heart J* 2012; 33: 2403–2418. doi: 10.1093/eurheartj/ehs255.
- 475 13. Dworakowski R, Wendler O, Bhan A, Smith L, Pearson P, Alcock E, et al. Successful  
476 transcatheter aortic valve implantation (TAVI) is associated with transient left  
477 ventricular dysfunction. *Heart* 2012; 98: 1641–1646. doi: 10.1136/heartjnl-2012-

- 478 302505.
- 479 14. Kim WK, Rolf A, Liebetrau C, Van Linden A, Blumenstein J, Kempfert J, et al.  
480 Detection of myocardial injury by CMR after transcatheter aortic valve replacement. *J*  
481 *Am Coll Cardiol* 2014; 64: 349–357. doi: 10.1016/j.jacc.2014.03.052.
- 482 15. Sarraf M, Burkhoff D, Brener MI. First-in-Man 4-Chamber Pressure-Volume Analysis  
483 During Transcatheter Aortic Valve Replacement for Bicuspid Aortic Valve Disease.  
484 *JACC Case Rep* 2021; 3: 77–81. doi: 10.1016/j.jaccas.2020.11.041.
- 485 16. Kim WK, Liebetrau C, van Linden A, Blumenstein J, Gaede L, Hamm CW, et al.  
486 Myocardial injury associated with transcatheter aortic valve implantation (TAVI). *Clin*  
487 *Res Cardiol* 2016; 105: 379–387. doi: 10.1007/s00392-015-0949-6.
- 488 17. Selle A, Figulla HR, Ferrari M, Rademacher W, Goebel B, Hamadanchi A, et al.  
489 Impact of rapid ventricular pacing during TAVI on microvascular tissue perfusion. *Clin*  
490 *Res Cardiol* 2014; 103: 902–911. doi: 10.1007/s00392-014-0728-9.
- 491 18. Acheampong A, Melot C, Benjelloun M, Cheval M, Reye F, Delporte C, et al. Effects  
492 of hyperoxia and cardiovascular risk factors on myocardial ischaemia-reperfusion  
493 injury: a randomized, sham-controlled parallel study. *Exp Physiol* 2021; 106: 1249–  
494 1262. doi: 10.1113/EP089320.
- 495 19. Mak S, Azevedo ER, Liu PP, Newton GE. Effect of hyperoxia on left ventricular  
496 function and filling pressures in patients with and without congestive heart failure.  
497 *Chest* 2001; 120: 467–473. doi: 10.1378/chest.120.2.467.
- 498 20. Kelly RF, Hursey TL, Parrillo JE, Schaer GL. Effect of 100% oxygen administration on  
499 infarct size and left ventricular function in a canine model of myocardial infarction and  
500 reperfusion. *Am Heart J* 1995; 130: 957–965. doi: 10.1016/0002-8703(95)90194-9.
- 501 21. Stub D, Smith K, Bernard S, Nehme Z, Stephenson M, Bray JE, et al. Air Versus  
502 Oxygen in ST-Segment-Elevation Myocardial Infarction. *Circulation* 2015; 131: 2143–

- 503 2150. doi: 10.1161/CIRCULATIONAHA.114.014494.
- 504 22. Girardis M, Busani S, Damiani E, Donati A, Rinaldi L, Marudi A, et al. Effect of  
505 Conservative vs Conventional Oxygen Therapy on Mortality Among Patients in an  
506 Intensive Care Unit: The Oxygen-ICU Randomized Clinical Trial. *JAMA* 2016; 316:  
507 1583–1589. doi: 10.1001/jama.2016.11993.
- 508 23. Hofmann R, James SK, Jernberg T, Lindahl B, Erlinge D, Witt N, et al. Oxygen  
509 Therapy in Suspected Acute Myocardial Infarction. *N Engl J Med* 2017; 377: 1240–  
510 1249. doi: 10.1056/NEJMoa1706222.
- 511 24. ICU-ROX Investigators and the Australian and New Zealand Intensive Care Society  
512 Clinical Trials Group, Mackle D, Bellomo R, Bailey M, Beasley R, Deane A, et al.  
513 Conservative Oxygen Therapy during Mechanical Ventilation in the ICU. *N Engl J*  
514 *Med* 2020; 382: 989–998. doi: 10.1056/NEJMoa1903297.
- 515 25. Stewart RAH, Jones P, Dicker B, Jiang Y, Smith T, Swain A, et al. High flow oxygen  
516 and risk of mortality in patients with a suspected acute coronary syndrome: pragmatic,  
517 cluster randomised, crossover trial. *BMJ* 2021; 372: n355. doi: 10.1136/bmj.n355.
- 518 26. Buse GL, Matot I. Pro-Con Debate: Cardiac Troponin Measurement as Part of Routine  
519 Follow-up of Myocardial Damage Following Noncardiac Surgery. *Anesth Analg* 2022;  
520 134: 257–265. doi: 10.1213/ANE.0000000000005714.
- 521 27. Michail M, Cameron JN, Nerlekar N, Ihdahid AR, McCormick LM, Gooley R, et al.  
522 Periprocedural Myocardial Injury Predicts Short- and Long-Term Mortality in Patients  
523 Undergoing Transcatheter Aortic Valve Replacement. *Circ Cardiovasc Interv* 2018; 11:  
524 e007106. doi: 10.1161/CIRCINTERVENTIONS.118.007106.
- 525 28. Lahoud R, Butzel DW, Parsee A, Huang YL, Solomon RJ, DeVries JT, et al. Acute  
526 Kidney Recovery in Patients Who Underwent Transcatheter Versus Surgical Aortic  
527 Valve Replacement (from the Northern New England Cardiovascular Disease Study

528 Group). Am J Cardiol 2020; 125: 788–794. doi: 10.1016/j.amjcard.2019.11.024.  
529 29. Peillex M, Marchandot B, Matsushita K, Prinz E, Hess S, Reydel A, et al. Acute kidney  
530 injury and acute kidney recovery following Transcatheter Aortic Valve Replacement.  
531 PLoS One 2021; 16: e0255806. doi: 10.1371/journal.pone.0255806.

532

## 533 **Supporting information**

534 **S1 Fig. Changes in cardiac biomarkers in the first 72 h in patients including five**  
535 **patients who were excluded from the main analysis due to pre-procedural elevation of**  
536 **cardiac biomarkers after randomization and received a fraction of inspired oxygen of**  
537 **0.3 or 0.8 during transcatheter aortic valve implantation.** AUC, area under the curve; CK-  
538 MB, creatine kinase-myocardial band; hs-cTnI, high sensitivity cardiac troponin I; TAVI,  
539 transcatheter aortic valve implantation.

540 **S1 CONSORT Checklist.**

541

## 542 **Financial disclosure statement**

543 The authors received no specific funding for this work.

544

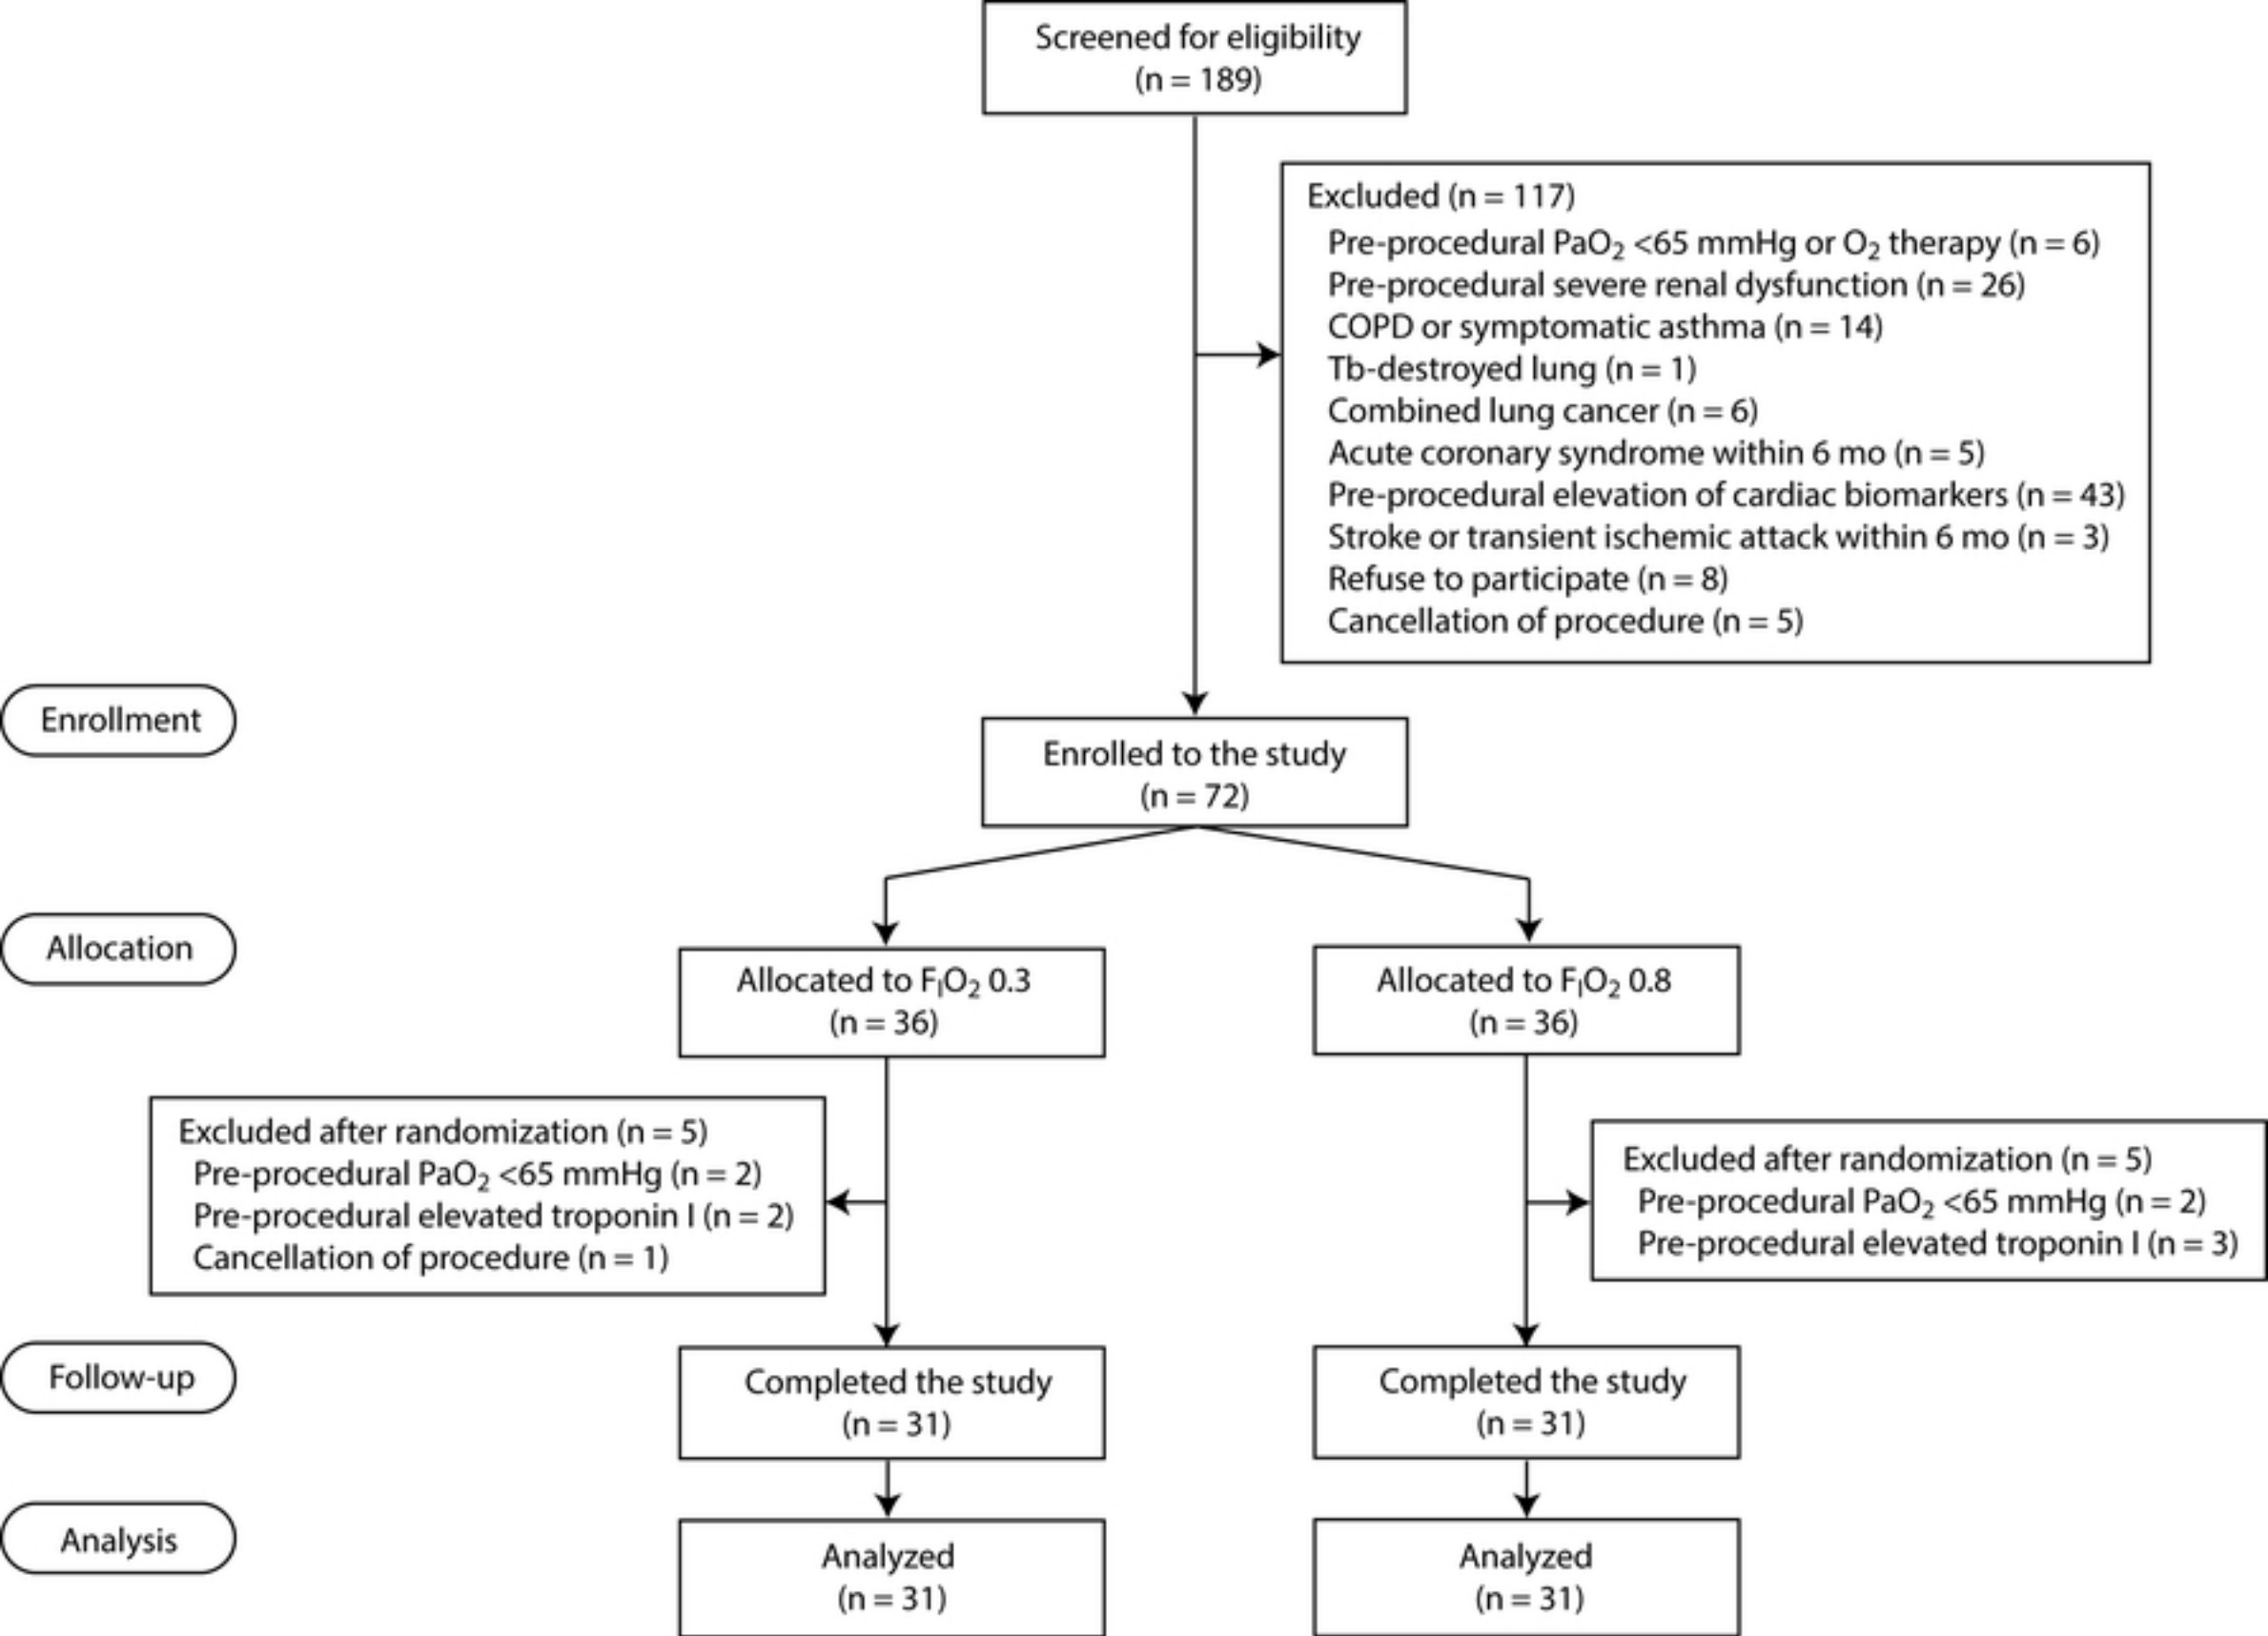

Figure 1

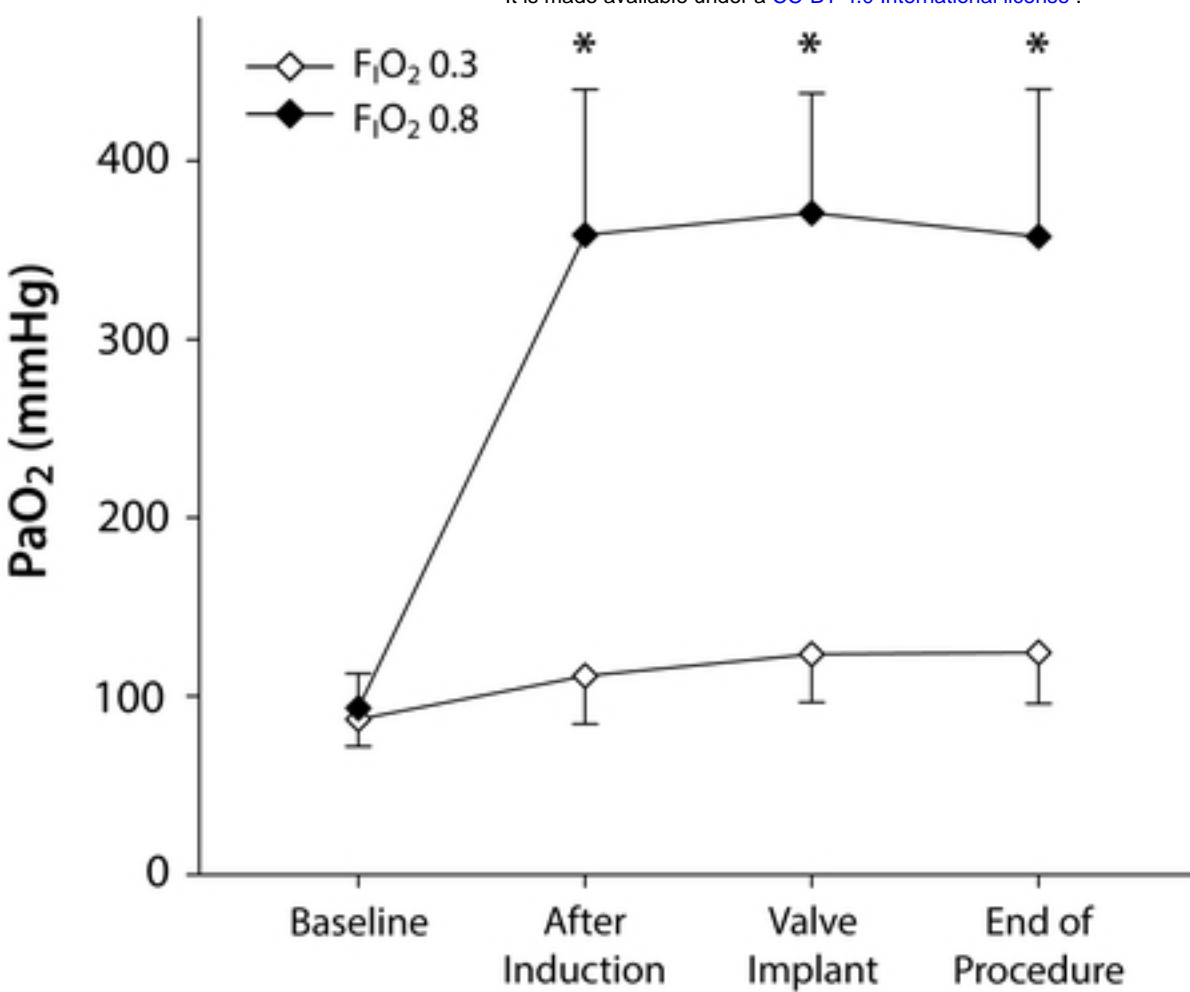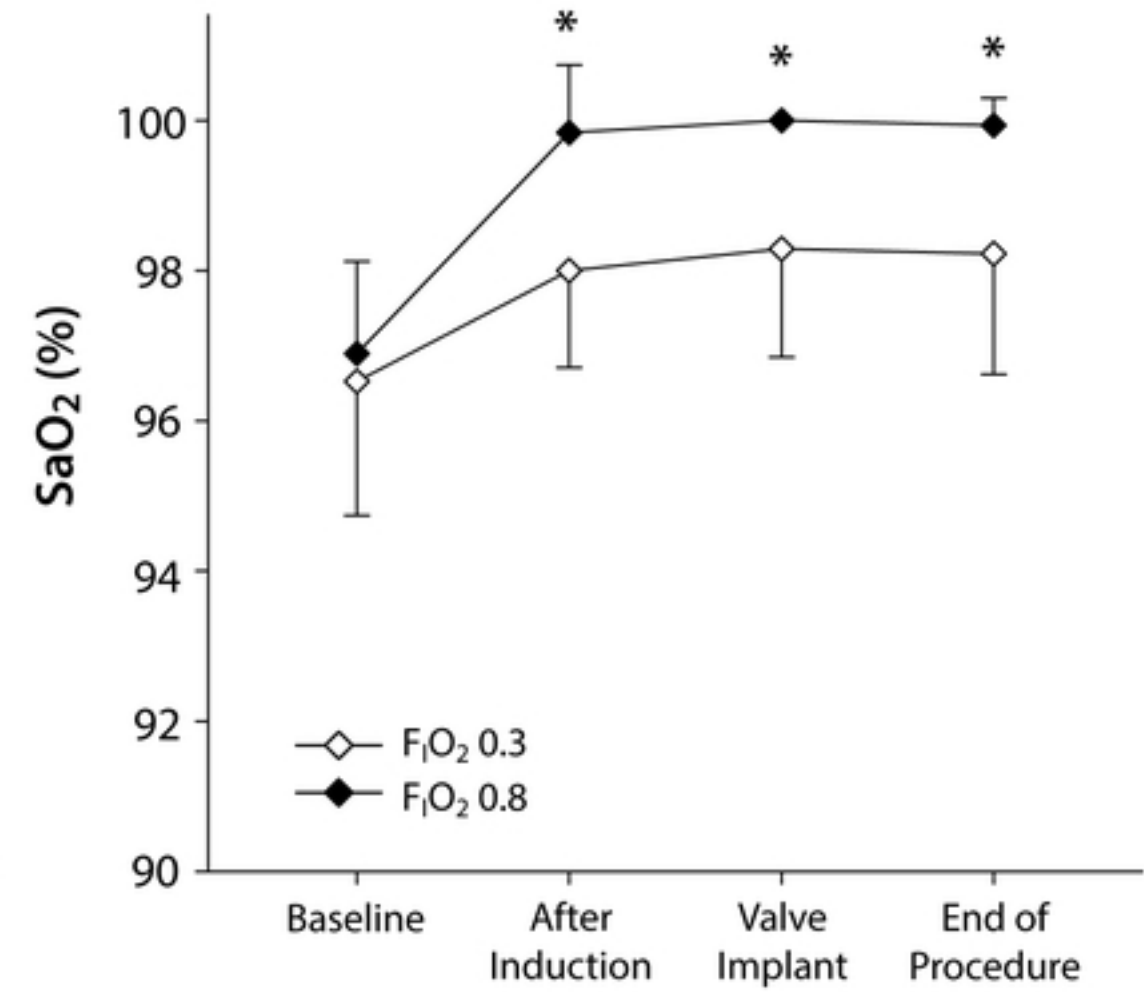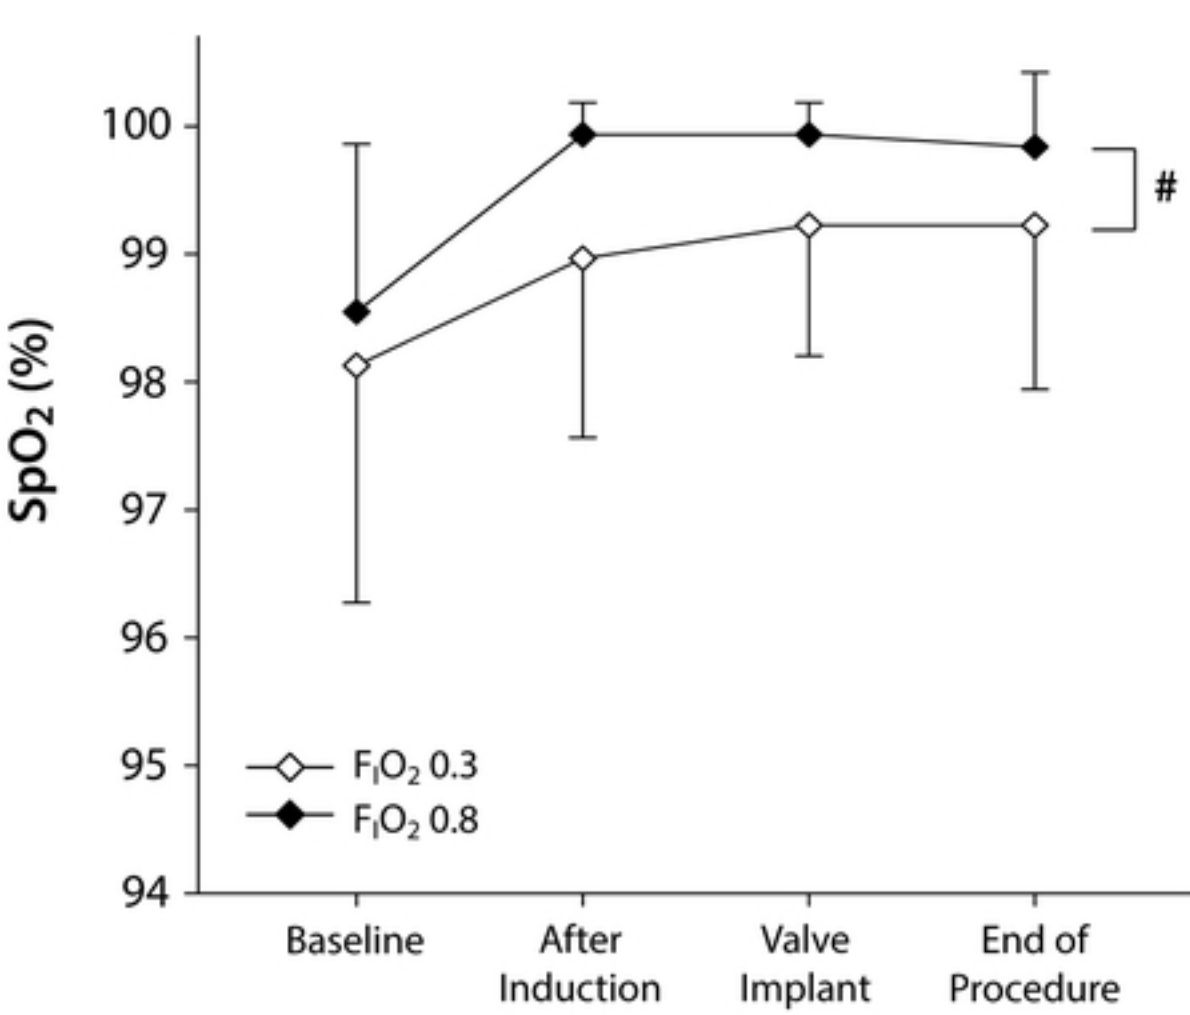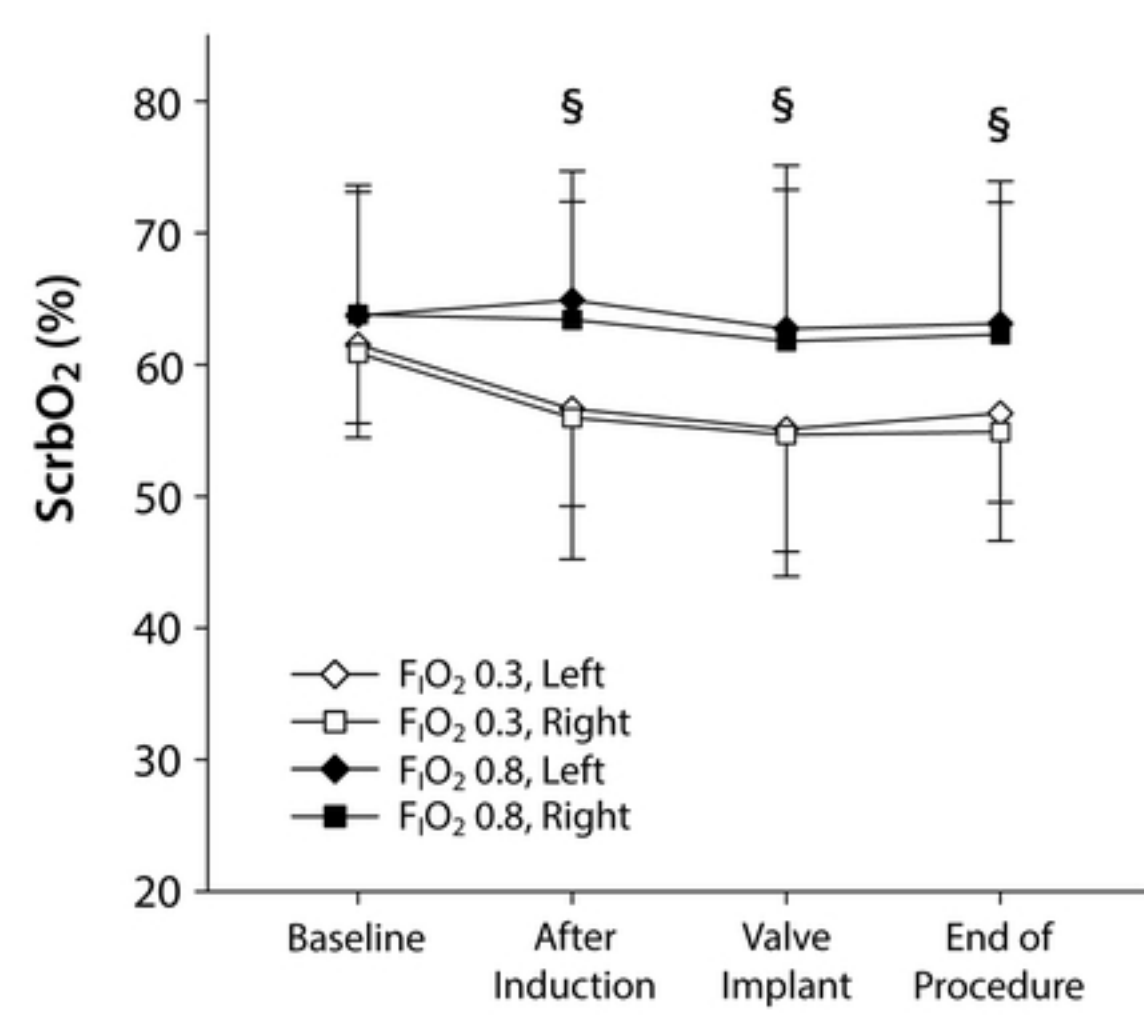

Figure 2

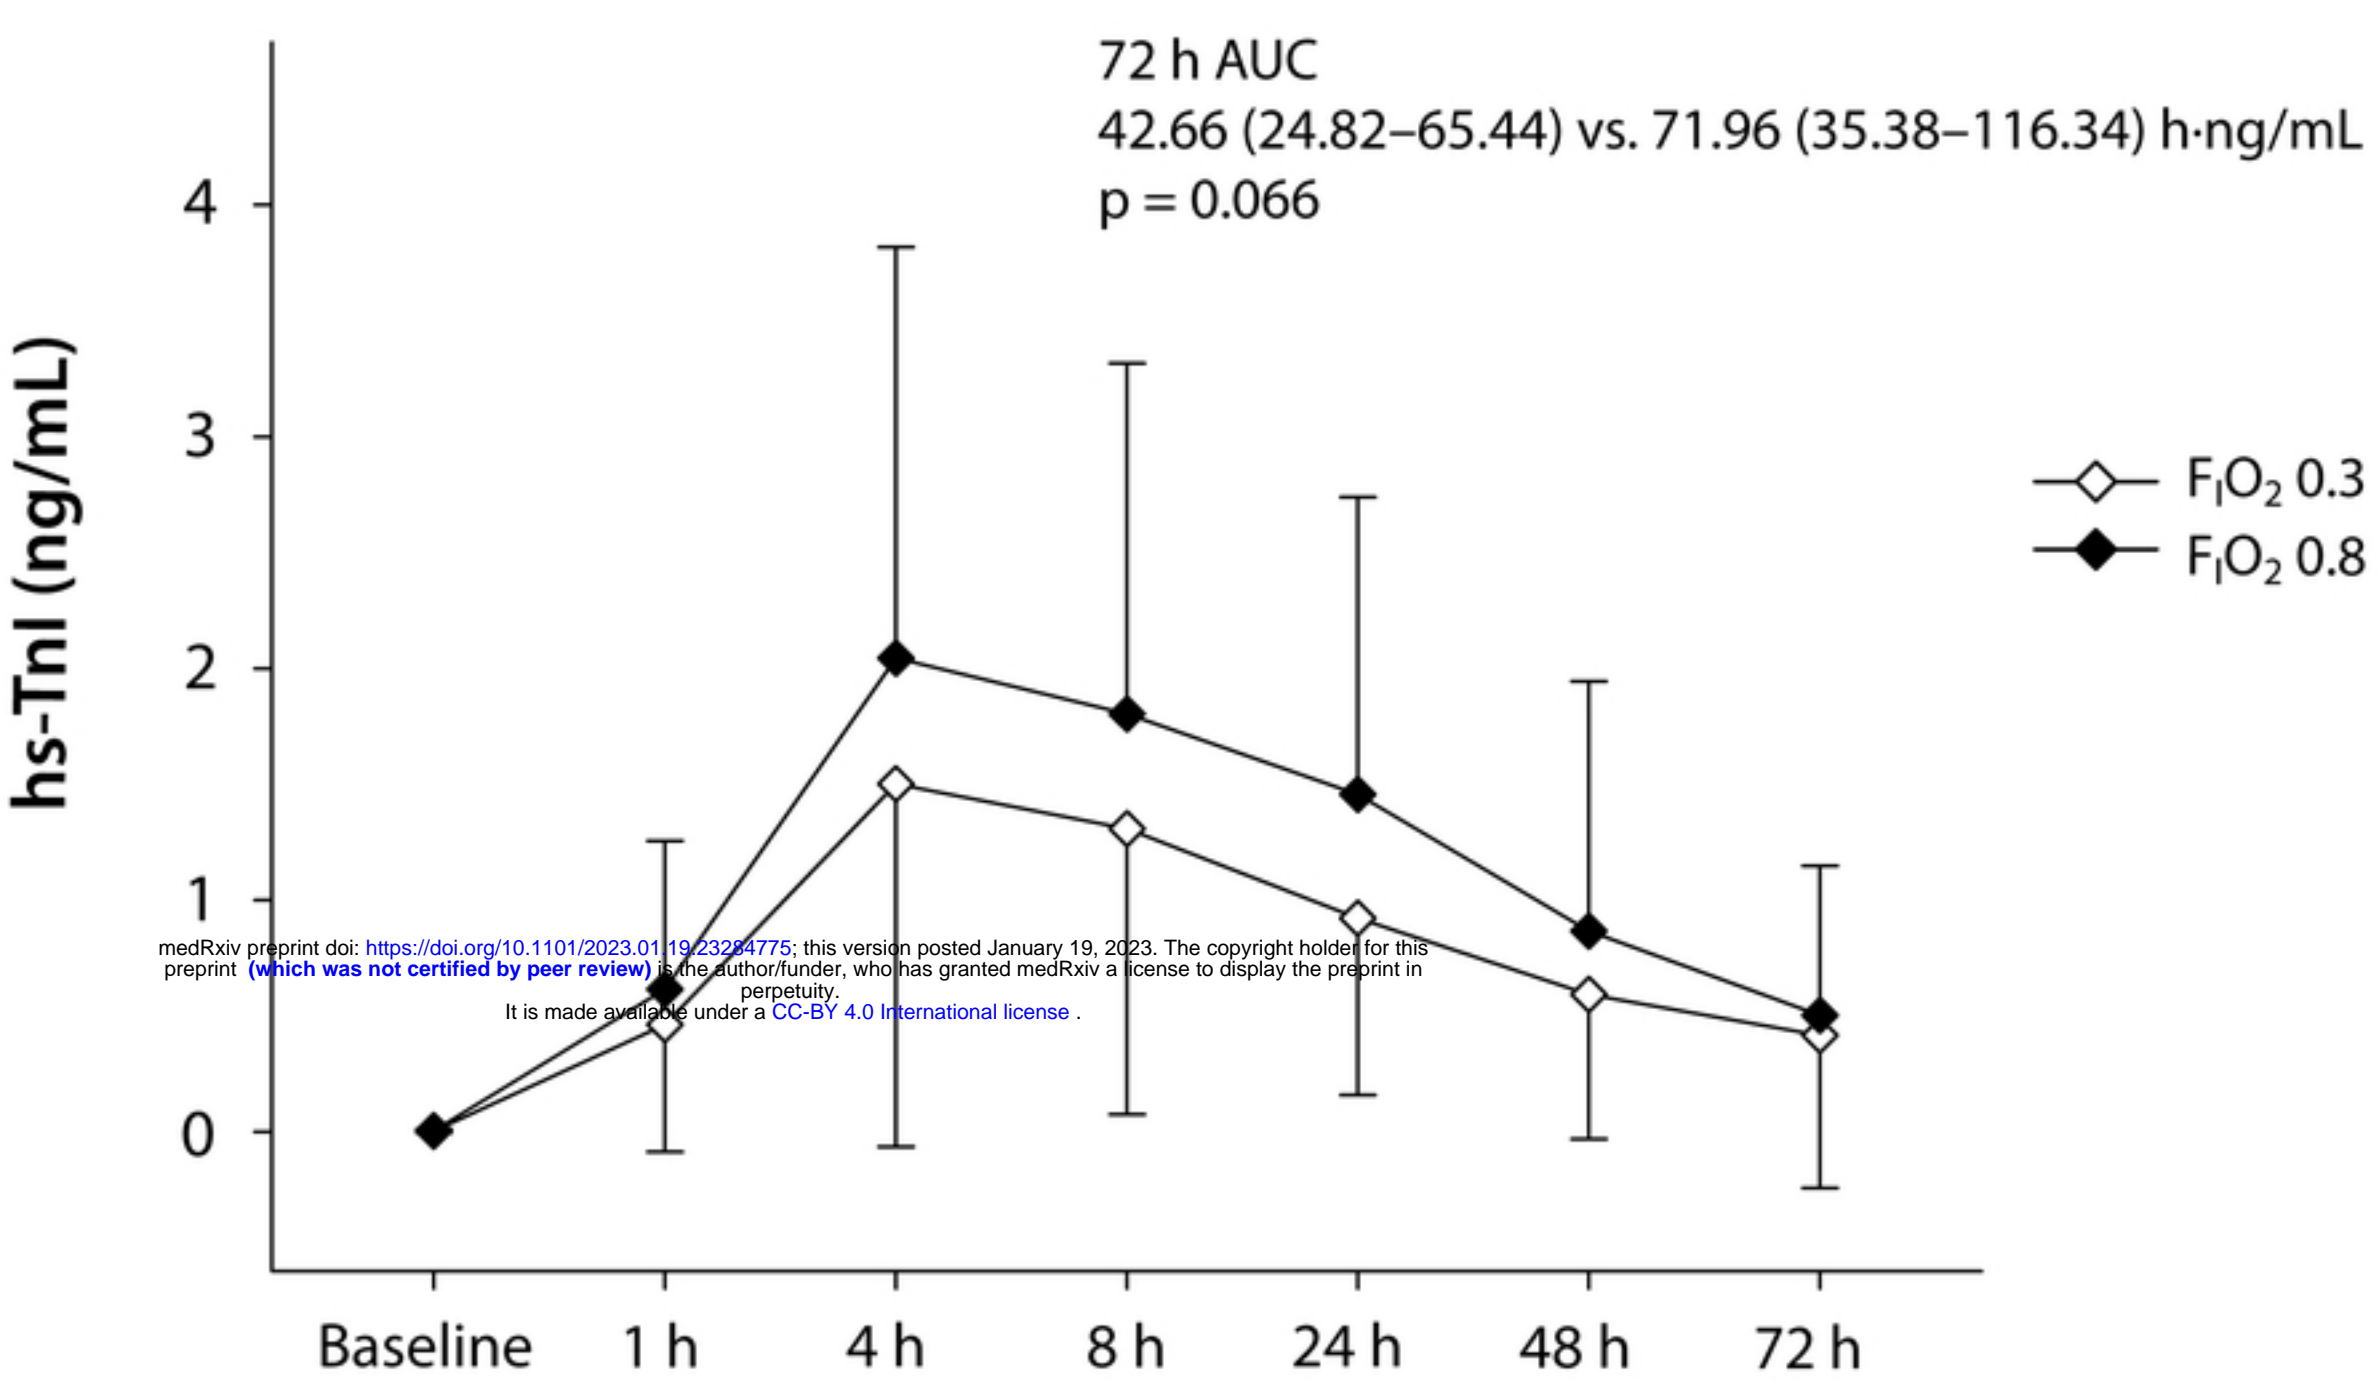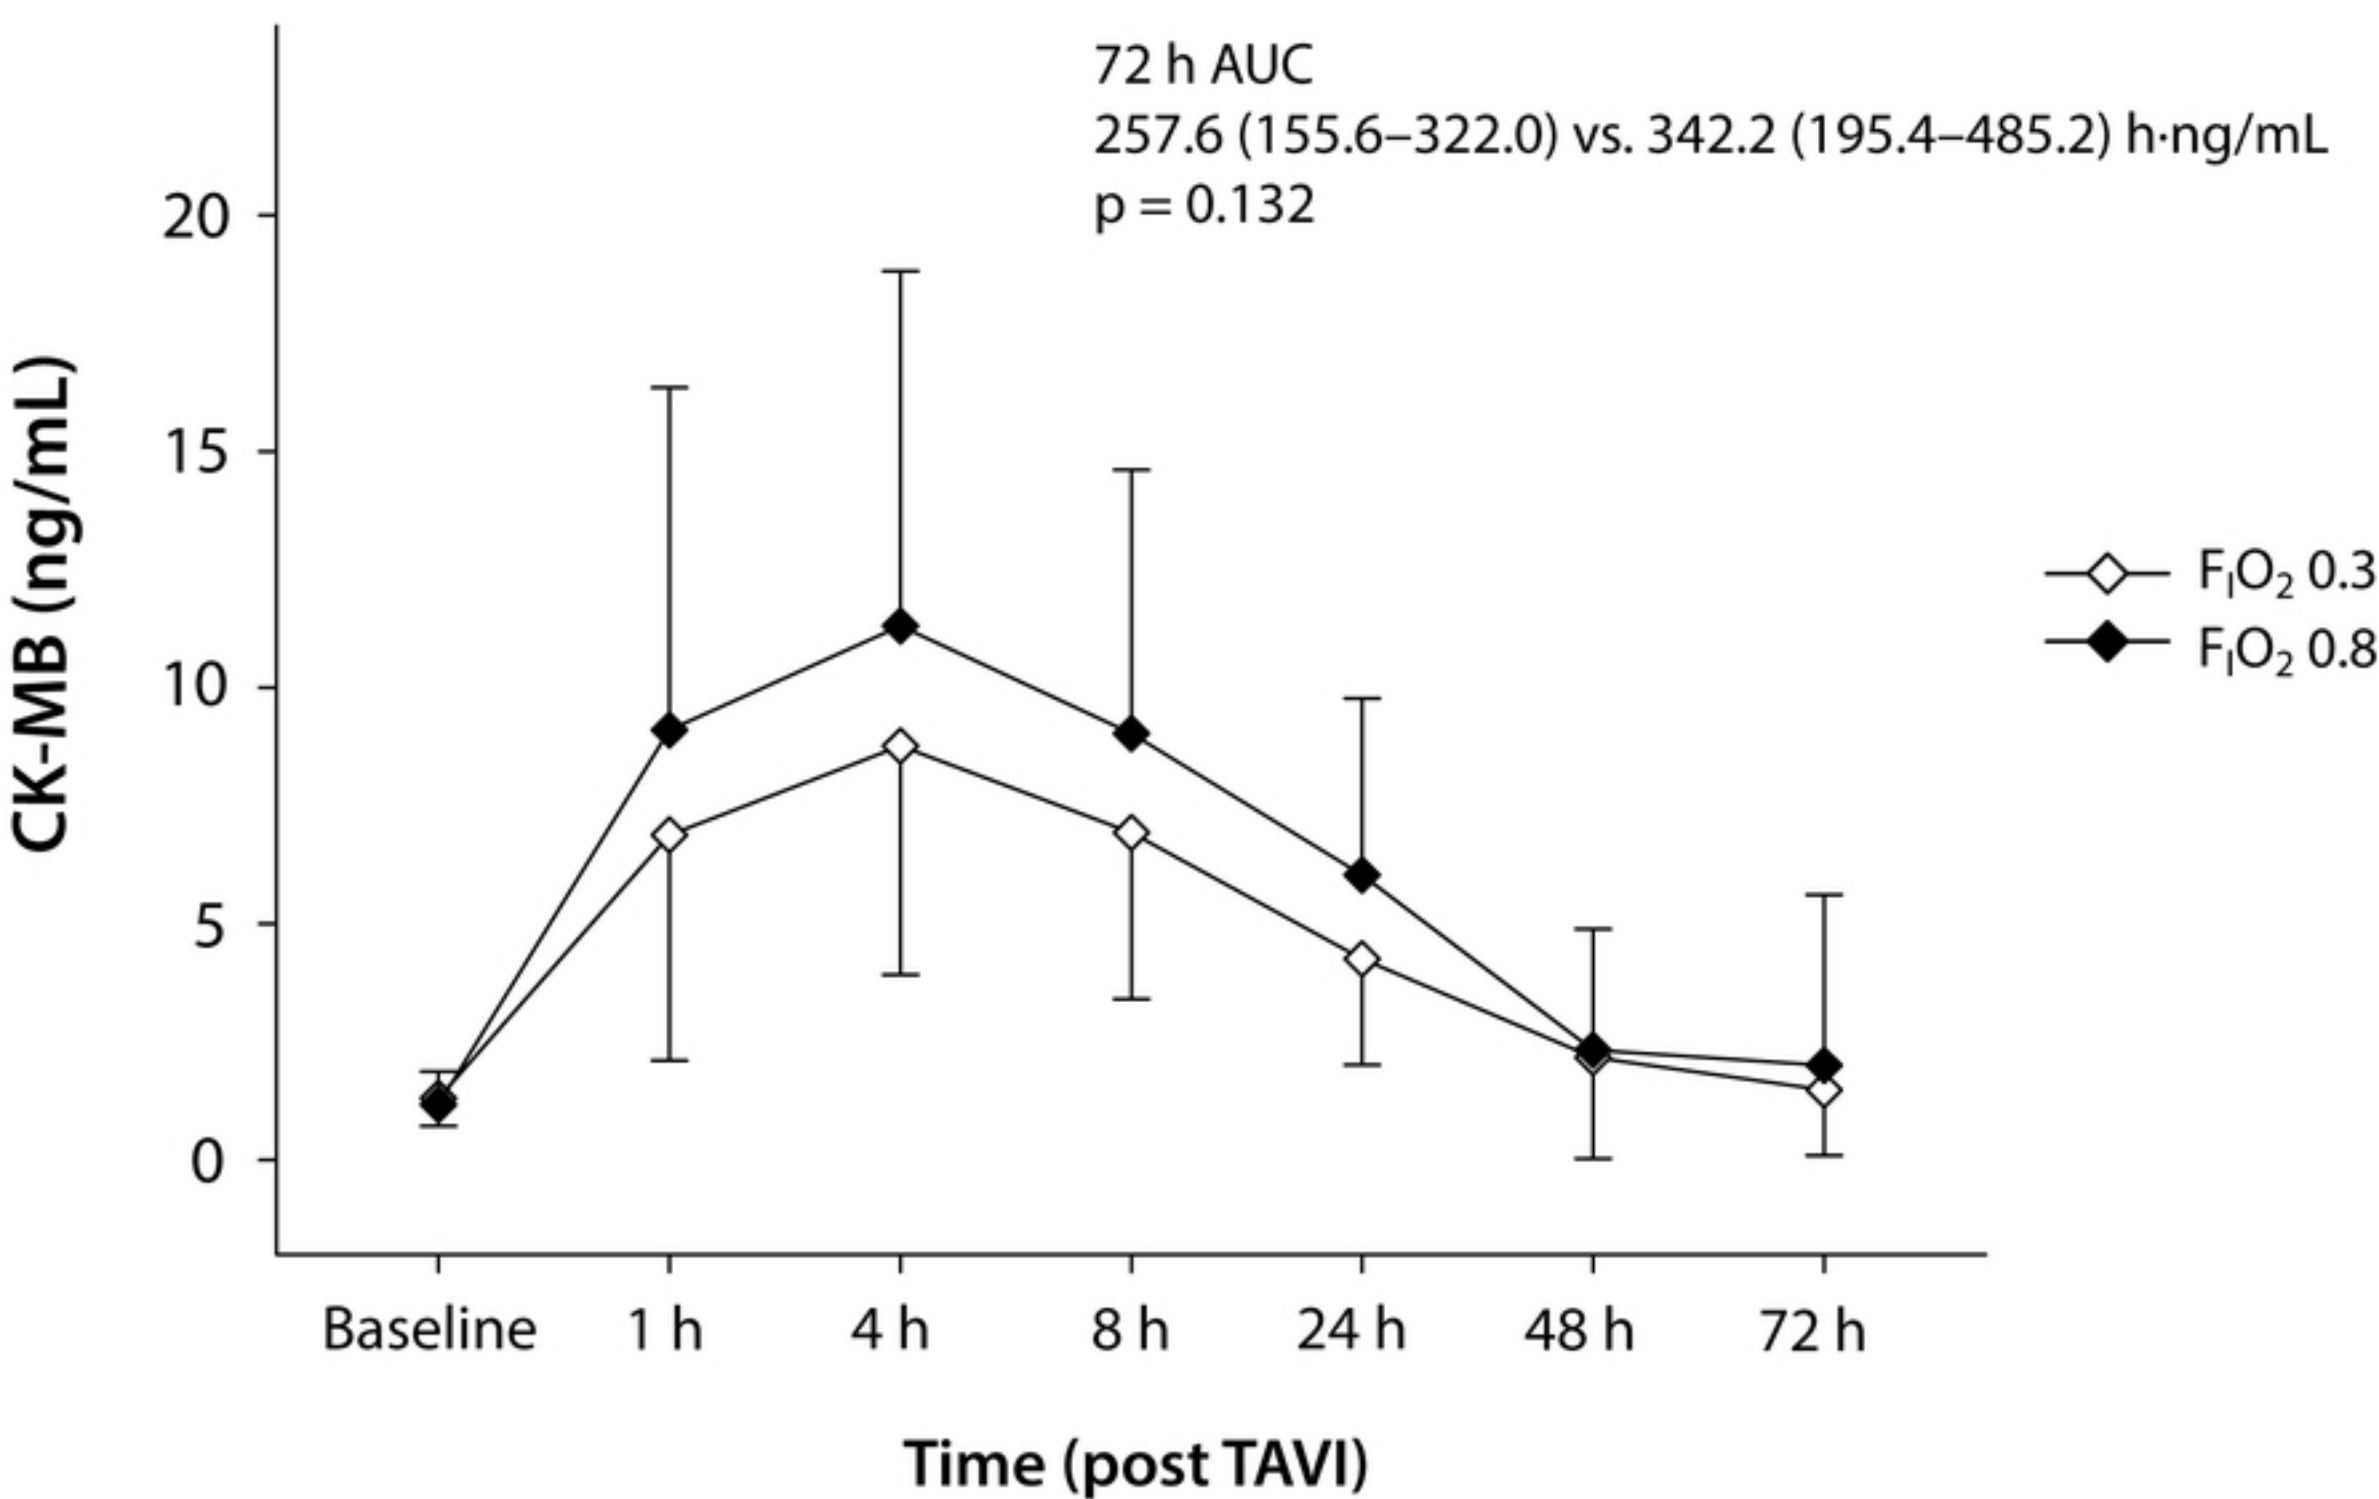

Figure3
